# Supplementary material
Source: PubMed Central journal article supplement (PMC3296836)
Supplement: NIHMS349700-supplement-Supp_Table_S1-S4___Fig_S1-S2.pdf [file NIHMS349700-supplement-Supp_Table_S1-S4___Fig_S1-S2.pdf]

**Supplementary Table 1.** Primer sequences used for PCR amplifications, sequencing reactions and promoter cloning. Underlined nucleotide sequences represent restriction site for cloning. Primers labeled with "seq" represent internal sequencing primers.

| Gene  | PCR reaction             | forward                                            | reverse                                            | sequence covered               |
|-------|--------------------------|----------------------------------------------------|----------------------------------------------------|--------------------------------|
| SHMT1 | 1                        | AGG GAC CTG CAG AAC TGA C                          | AGT ACA GAG GCA AGA TCA TTG                        | 5' flanking                    |
| SHMT1 | 2                        | AAG TGT TCA GTG GAG AGC TAC                        | GTA GTC TTC CTG GAA ATC TTG                        | exon 1                         |
| SHMT1 | 3                        | CCT GTG AAC TGT CAG GAA AG                         | TTT AAT TCT GGA AGC TAC ACA TG                     | exon 2                         |
| SHMT1 | 4                        | CTT CAG TGT TAT CAC ATG CTG                        | TAC TAA AAC CTT TGA GGA GGA                        | exon 3                         |
| SHMT1 | 5                        | CAA GGA AAT AAA AGC TAG GAG                        | TGA GTG GAT CTA AGT CTC CTG                        | exons 4 & 5                    |
| SHMT1 | 5-seqF                   | GAG ATG GAG TTT CGC TCT T                          |                                                    | exons 4 & 5                    |
| SHMT1 | 5-seqR                   |                                                    | ATA AAA GAT AAG TCA CGC ATC                        | exons 4 & 5                    |
| SHMT1 | 6                        | CTC CCT CAA CTG AAT CTG AAC                        | TAG GAC ATC ATT CCT CTT GTC                        | exons 6 & 7                    |
| SHMT1 | 7                        | CCT ACT CTG TGT TAG CAT CTC                        | GTT ACA AAT CAG TTC TCC ATG                        | exon 8                         |
| SHMT1 | 8                        | CTG TTC TGA GGA CAA GCA GTC                        | TGA CAT TGA AAA GCA AGG AAG                        | exon 9                         |
| SHMT1 | 9                        | TGC AGA TGG GAG AGG AGT G                          | CCA AAG TAA ATT GAA CTG CTG                        | exon 10                        |
| SHMT1 | 9-seqR                   |                                                    | GAG CCT TTA CCA TCA ATG T                          | exon 10                        |
| SHMT1 | 10                       | AGG CAC AAA TGT CAG AAT GTC                        | GCA TTT CTC TGT GGG TTG TTA                        | exon 11                        |
| SHMT1 | 11                       | TAC TGG GTG CAT CTT GTT TAC                        | AGT AAT TGA GGT AAG CAT GGA                        | exon 12                        |
| SHMT1 | 12                       | ATT GTC TGC CAC TAA ATA GCT                        | TTC TGC TGT AAA TCA GAA GTG                        | exon 12 and 3' flanking        |
| SHMT1 | 13                       | ATA GTG GGC AGT CTC CTT TAC                        | GGT GGC ATT TAT CTC AAT CTG                        | 3' flanking                    |
| SHMT1 | Promoter reporter assay  | AGG ACA <u>ACG CGT</u> CTC TGC CTC CCA GGC TCA AG  | AGG ACA <u>CTC GAG</u> CCC CCG GAG GCG CCC AAT C   | 5' flanking                    |
| SHMT1 | rs669340 reporter assay  | AGG ACA <u>GGT ACC</u> TCA CAC TTT CTC CTT TGT CTG | AGG ACA <u>ACG CGT</u> AAG AGA ACA AGA CCC TGT CTC | intron 1                       |
| SHMT1 | rs7207306 reporter assay | AGG ACA <u>GGT ACC</u> TAT TTG GAA AGA GTG ACC ACC | AGG ACA <u>ACG CGT</u> CAT AAC CAG CAG AGC ATA GAG | intron 5                       |
| SHMT2 | 1                        | ACA TAC CAC CAT GCC TAG GT                         | CTC AAA CTT GTG CTT CTA GG                         | 5' flanking, exon1, and exon 2 |
| SHMT2 | 1seqF                    | CTTGGCTTATCAGAATCACTG                              |                                                    | 5' flanking, exon1, and exon 2 |
| SHMT2 | 1seqR1                   |                                                    | TAGGGTGCCTACTGAATATC                               | 5' flanking, exon1, and exon 2 |
| SHMT2 | 1seqF1                   | CACAAGCTAATGCACTAGTC                               |                                                    | 5' flanking, exon1, and exon 2 |
| SHMT2 | 1seqR2                   |                                                    | AAAGGCTCAGCTTGTGAGAC                               | 5' flanking, exon1, and exon 2 |
| SHMT2 | 1seqF2                   | CCATTTACGTGGCATTAG                                 |                                                    | 5' flanking, exon1, and exon 2 |
| SHMT2 | 1seqR3                   |                                                    | CACATCTCAGGATCACTGTC                               | 5' flanking, exon1, and exon 2 |
| SHMT2 | 1seqF3                   | GATTTGTCTGGACTGTTGTG                               |                                                    | 5' flanking, exon1, and exon 2 |
| SHMT2 | 2                        | TTC CTT TCT TAT CTC CCT CAA                        | CTT GTT GGC AGT GAT GGA TAC                        | exons 3-10                     |
| SHMT2 | 2seqR1                   |                                                    | GTGAGAGGAAGTAAGAAGGC                               | exons 3-10                     |
| SHMT2 | 2seqF1                   | ACTGTGGACCATACAGATGG                               |                                                    | exons 3-10                     |
| SHMT2 | 2seqR2                   |                                                    | CTTGGTACACTGGATTCCAG                               | exons 3-10                     |
| SHMT2 | 2seqF2                   | GACCTGAGAGGAATTCATTC                               |                                                    | exons 3-10                     |
| SHMT2 | 3                        | GGC TAC TCA CTG GTA TCA GGT                        | CTT GGG ATC TGT GTC TGA TTC                        | exons 10-12 and 3' flanking    |
| SHMT2 | 3seqR1                   |                                                    | TAAGTGAGAGGTCTTCCCTC                               | exons 10-12 and 3' flanking    |
| SHMT2 | 3seqF1                   | CTCAAAGTTACTCTCCTTCC                               |                                                    | exons 10-12 and 3' flanking    |
| SHMT2 | 3seqR2                   |                                                    | ATCCACTTCTTCCACTCCTC                               | exons 10-12 and 3' flanking    |
| SHMT2 | 3seqF2                   | CTTCTGTTGGCTCACGTAG                                |                                                    | exons 10-12 and 3' flanking    |

**Supplementary Table 2.** *SHMT1* and *SHMT2* polymorphisms. The table lists variant sequence locations, DNA sequence alterations, amino acid sequence alterations, rs numbers (when available) and MAF values for both the "Human Variation Panel" and "1000 Genomes" data.

| Gene  | Chr | Location (build36) | Location | Nucleotide | RefSNP ID  | Sequence Change | Amino Acid | MAF     |         |         | 1000 Genomes MAF |       |       |
|-------|-----|--------------------|----------|------------|------------|-----------------|------------|---------|---------|---------|------------------|-------|-------|
|       |     |                    |          |            |            |                 |            | AA      | EA      | HCA     | AA               | EA    | HCA   |
| SHMT1 | 17  | 18208440           | 5'FR     | -1049      |            | A→G             |            | 0.000   | 0.000   | 0.005   | NA               | NA    | NA    |
| SHMT1 | 17  | 18208394           | 5'FR     | -1003      | rs57739150 | C→G             |            | 0.021   | 0.000   | 0.000   | 0.037            | NA    | NA    |
| SHMT1 | 17  | 18208380           | 5'FR     | -989       |            | C→G             |            | 0.016   | 0.000   | 0.000   | 0.011            | NA    | NA    |
| SHMT1 | 17  | 18208289           | 5'FR     | -898       | rs60510653 | A→G             |            | 0.135   | 0.005   | 0.000   | 0.190            | 0.004 | 0.003 |
| SHMT1 | 17  | 18208216           | 5'FR     | -825       | rs62072547 | T→C             |            | 0.031   | 0.141   | 0.000   | 0.006            | 0.092 | NA    |
| SHMT1 | 17  | 18208109           | 5'FR     | -718       | rs9303145  | C→G             |            | 0.120   | 0.000   | 0.000   | 0.132            | NA    | NA    |
| SHMT1 | 17  | 18208106           | 5'FR     | -715       |            | C→T             |            | 0.010   | 0.000   | 0.198   | NA               | 0.004 | 0.129 |
| SHMT1 | 17  | 18208095           | 5'FR     | -704       |            | C→T             |            | 0.000   | 0.005   | 0.000   | NA               | NA    | NA    |
| SHMT1 | 17  | 18208046           | 5'FR     | -655       |            | C→T             |            | 0.005   | 0.000   | 0.000   | NA               | NA    | NA    |
| SHMT1 | 17  | 18208030           | 5'FR     | -639       |            | G→A             |            | 0.005   | 0.000   | 0.000   | NA               | NA    | NA    |
| SHMT1 | 17  | 18207934           | 5'FR     | -543       | rs7213472  | A→G             |            | 0.135   | 0.005   | 0.000   | 0.190            | NA    | NA    |
| SHMT1 | 17  | 18207887           | 5'FR     | -496       |            | A→G             |            | 0.000   | 0.005   | 0.000   | NA               | NA    | NA    |
| SHMT1 | 17  | 18207764           | 5'FR     | -373       | rs643333   | C→A             |            | 0.089   | 0.242   | 0.036   | 0.011            | 0.277 | 0.090 |
| SHMT1 | 17  | 18207738           | 5'FR     | -347       | rs9907337  | C→T             |            | 0.083   | 0.000   | 0.000   | 0.083            | 0.005 | NA    |
| SHMT1 | 17  | 18207700           | 5'FR     | -309       | rs638416   | C→G             |            | 0.260   | 0.404   | 0.448   | 0.253            | 0.385 | 0.454 |
| SHMT1 | 17  | 18207655           | 5'FR     | -264       |            | G→A             |            | 0.036   | 0.000   | 0.000   | 0.052            | NA    | NA    |
| SHMT1 | 17  | 18207634           | 5'FR     | -243       |            | A→G             |            | 0.000   | 0.011   | 0.000   | NA               | NA    | NA    |
| SHMT1 | 17  | 18207619           | 5'FR     | -228       |            | C→T             |            | 0.000   | 0.000   | 0.005   | NA               | NA    | NA    |
| SHMT1 | 17  | 18207573           | 5'UTR    | -182       |            | C→T             |            | 0.016   | 0.011   | 0.000   | NA               | 0.018 | NA    |
| SHMT1 | 17  | 18207549           | 5'UTR    | -158       |            | G→C/A           |            | 0.016/0 | 0.005/0 | 0/0.005 | NA               | NA    | NA    |
| SHMT1 | 17  | 18207511           | 5'UTR    | -120       |            | C→T             |            | 0.047   | 0.000   | 0.000   | 0.040            | 0.002 | NA    |
| SHMT1 | 17  | 18207468           | 5'UTR    | -77        |            | G→A             |            | 0.000   | 0.000   | 0.005   | NA               | NA    | NA    |
| SHMT1 | 17  | 18207341           | intron 1 | 70         | rs35311598 | G(6)→G(7)       |            | 0.208   | 0.250   | 0.036   | NA               | NA    | NA    |
| SHMT1 | 17  | 18207315           | intron 1 | 76         |            | C→T             |            | 0.022   | 0.000   | 0.000   | NA               | NA    | NA    |
| SHMT1 | 17  | 18207292           | intron 1 | 119        | rs672356   | C→T             |            | 0.187   | 0.255   | 0.036   | 0.155            | 0.284 | 0.077 |
| SHMT1 | 17  | 18207257           | intron 1 | 154        | rs9900382  | G→A             |            | 0.110   | 0.005   | 0.000   | 0.135            | 0.004 | NA    |
| SHMT1 | 17  | 18207220           | intron 1 | 191        |            | G(4)→G(3)       |            | 0.089   | 0.000   | 0.000   | NA               | NA    | NA    |
| SHMT1 | 17  | 18207184           | intron 1 | 227        |            | G→A             |            | 0.000   | 0.005   | 0.000   | NA               | NA    | NA    |
| SHMT1 | 17  | 18199816           | intron 2 | 109        |            | G→A             |            | 0.047   | 0.000   | 0.000   | 0.049            | 0.002 | NA    |
| SHMT1 | 17  | 18197704           | intron 3 | 7          | rs2273026  | G→A             |            | 0.104   | 0.125   | 0.182   | 0.072            | 0.092 | 0.201 |
| SHMT1 | 17  | 18197701           | intron 3 | 10         |            | T→C             |            | 0.094   | 0.005   | 0.000   | 0.103            | NA    | NA    |
| SHMT1 | 17  | 18192106           | intron 4 | 258        |            | C→T             |            | 0.000   | 0.000   | 0.005   | NA               | NA    | NA    |
| SHMT1 | 17  | 18192034           | intron 4 | 330        |            | T→C             |            | 0.000   | 0.000   | 0.016   | NA               | NA    | NA    |
| SHMT1 | 17  | 18191987           | intron 4 | 377        |            | C→T             |            | 0.000   | 0.000   | 0.020   | NA               | NA    | NA    |
| SHMT1 | 17  | 18191961           | intron 4 | 403        | rs12451807 | A→C             |            | 0.109   | 0.240   | 0.333   | NA               | NA    | NA    |
| SHMT1 | 17  | 18191957           | intron 4 | 407        | rs4924850  | A→C             |            | 0.130   | 0.000   | 0.000   | NA               | NA    | NA    |

|       |    |          |           |      |            |     |             |       |       |       |       |       |       |
|-------|----|----------|-----------|------|------------|-----|-------------|-------|-------|-------|-------|-------|-------|
| SHMT1 | 17 | 18191819 | intron 4  | -124 | rs28479066 | G→A |             | 0.130 | 0.005 | 0.000 | 0.152 | NA    | NA    |
| SHMT1 | 17 | 18191694 | exon 5    | 360  |            | C→T | Gly(120)Gly | 0.000 | 0.005 | 0.000 | NA    | NA    | NA    |
| SHMT1 | 17 | 18184858 | intron 5  | -6   |            | C→G |             | 0.010 | 0.000 | 0.000 | NA    | NA    | NA    |
| SHMT1 | 17 | 18184598 | intron 6  | 173  | rs62072544 | G→A |             | 0.109 | 0.234 | 0.333 | 0.170 | 0.198 | 0.214 |
| SHMT1 | 17 | 18184597 | intron 6  | 174  | rs62072543 | C→T |             | 0.109 | 0.234 | 0.333 | 0.170 | 0.198 | 0.214 |
| SHMT1 | 17 | 18184523 | intron 6  | 248  |            | G→A |             | 0.000 | 0.000 | 0.005 | NA    | NA    | NA    |
| SHMT1 | 17 | 18184522 | intron 6  | 349  |            | C→T |             | 0.000 | 0.000 | 0.005 | NA    | NA    | NA    |
| SHMT1 | 17 | 18184363 | intron 6  | -69  | rs9897954  | C→T |             | 0.109 | 0.000 | 0.000 | 0.089 | 0.011 | NA    |
| SHMT1 | 17 | 18184249 | exon 7    | 647  |            | A→G | Lys(216)Arg | 0.031 | 0.000 | 0.000 | 0.009 | 0.004 | NA    |
| SHMT1 | 17 | 18184178 | exon 7    | 718  |            | G→A | Val(240)Met | 0.005 | 0.000 | 0.000 | NA    | NA    | NA    |
| SHMT1 | 17 | 18179737 | intron 7  | -23  | rs2273028  | C→T |             | 0.500 | 0.260 | 0.036 | 0.494 | 0.313 | 0.093 |
| SHMT1 | 17 | 18179717 | intron7   | -3   |            | C→T |             | 0.016 | 0.000 | 0.000 | 0.011 | 0.002 | NA    |
| SHMT1 | 17 | 18177381 | intron 8  | -54  |            | C→G |             | 0.005 | 0.000 | 0.000 | NA    | NA    | NA    |
| SHMT1 | 17 | 18177241 | exon 9    | 1018 | rs7215148  | G→C | Glu(340)Gln | 0.016 | 0.000 | 0.000 | NA    | NA    | NA    |
| SHMT1 | 17 | 18177199 | intron 9  | 6    |            | G→A |             | 0.010 | 0.000 | 0.000 | 0.006 | NA    | NA    |
| SHMT1 | 17 | 18177104 | intron 9  | 101  |            | C→T |             | 0.000 | 0.000 | 0.005 | NA    | NA    | NA    |
| SHMT1 | 17 | 18177064 | intron 9  | 141  | rs2273029  | C→T |             | 0.115 | 0.234 | 0.333 | 0.172 | 0.249 | 0.260 |
| SHMT1 | 17 | 18177063 | intron 9  | 142  |            | G→A |             | 0.000 | 0.005 | 0.000 | NA    | NA    | NA    |
| SHMT1 | 17 | 18174896 | intron 9  | -186 |            | C→T |             | 0.000 | 0.005 | 0.000 | NA    | NA    | NA    |
| SHMT1 | 17 | 18174873 | intron 9  | -163 |            | C→T |             | 0.036 | 0.000 | 0.000 | 0.049 | NA    | NA    |
| SHMT1 | 17 | 18174753 | intron 9  | -43  | rs8080285  | A→C |             | 0.260 | 0.005 | 0.000 | 0.259 | 0.018 | NA    |
| SHMT1 | 17 | 18174745 | intron 9  | -35  |            | C→T |             | 0.000 | 0.005 | 0.000 | NA    | NA    | NA    |
| SHMT1 | 17 | 18173683 | intron 10 | -26  | rs2125154  | A→C |             | 0.193 | 0.000 | 0.000 | 0.172 | 0.016 | NA    |
| SHMT1 | 17 | 18173453 | intron 10 | -256 |            | G→A |             | 0.000 | 0.005 | 0.000 | NA    | NA    | NA    |
| SHMT1 | 17 | 18173296 | intron 11 | 21   | rs6502648  | G→T |             | 0.188 | 0.000 | 0.000 | 0.167 | 0.016 | NA    |
| SHMT1 | 17 | 18173243 | intron 11 | 74   | rs17806333 | A→G |             | 0.000 | 0.005 | 0.000 | NA    | NA    | NA    |
| SHMT1 | 17 | 18173113 | intron 11 | -155 |            | G→A |             | 0.000 | 0.005 | 0.000 | NA    | NA    | NA    |
| SHMT1 | 17 | 18172861 | exon 12   | 1380 |            | C→T | Ala(460)Ala | 0.037 | 0.000 | 0.000 | 0.049 | NA    | NA    |
| SHMT1 | 17 | 18172828 | exon 12   | 1413 |            | C→T | Phe(471)Phe | 0.005 | 0.000 | 0.000 | NA    | NA    | NA    |
| SHMT1 | 17 | 18172821 | exon 12   | 1420 | rs1979277  | C→T | Leu(474)Phe | 0.337 | 0.266 | 0.036 | 0.356 | 0.299 | 0.095 |
| SHMT1 | 17 | 18172742 | 3'UTR     | 1499 | rs1979276  | C→G |             | 0.200 | 0.260 | 0.036 | 0.155 | 0.302 | 0.090 |
| SHMT1 | 17 | 18172737 | 3'UTR     | 1504 |            | C→T |             | 0.011 | 0.026 | 0.000 | 0.009 | 0.021 | 0.005 |
| SHMT1 | 17 | 18172723 | 3'UTR     | 1518 |            | C→T |             | 0.379 | 0.729 | 0.964 | 0.376 | 0.318 | 0.093 |
| SHMT1 | 17 | 18172522 | 3'UTR     | 1719 | rs12952556 | A→G |             | 0.347 | 0.266 | 0.036 | 0.362 | 0.304 | 0.093 |



|       |    |          |          |      |            |                     |             |       |       |       |       |       |       |
|-------|----|----------|----------|------|------------|---------------------|-------------|-------|-------|-------|-------|-------|-------|
| SHMT2 | 12 | 55911274 | intron2  | 224  |            | deletion of TCCT    |             | 0.396 | 0.313 | 0.411 | NA    | NA    | NA    |
| SHMT2 | 12 | 55911343 | intron2  | 293  |            | G→A                 |             | 0.000 | 0.000 | 0.036 | NA    | NA    | 0.026 |
| SHMT2 | 12 | 55911812 | exon4    | 361  |            | C→T                 | Arg(121)Cys | 0.000 | 0.000 | 0.005 | NA    | NA    | NA    |
| SHMT2 | 12 | 55912217 | intron4  | 244  |            | G→A                 |             | 0.057 | 0.000 | 0.083 | 0.078 | NA    | 0.124 |
| SHMT2 | 12 | 55912285 | exon5    | 537  | rs11557166 | C→T                 | Asp(179)Asp | 0.026 | 0.000 | 0.083 | 0.037 | NA    | 0.124 |
| SHMT2 | 12 | 55912632 | intron6  | 7    |            | deletion of G       |             | 0.000 | 0.000 | 0.005 | NA    | NA    | NA    |
| SHMT2 | 12 | 55912711 | intron6  | 89   |            | C→T                 |             | 0.021 | 0.000 | 0.000 | 0.046 | 0.002 | 0.003 |
| SHMT2 | 12 | 55912834 | exon7    | 798  | rs2229715  | G→A                 | Ser(266)Ser | 0.005 | 0.000 | 0.000 | NA    | NA    | NA    |
| SHMT2 | 12 | 55912849 | exon7    | 812  | rs2229716  | G→A                 | Ala(271)Ala | 0.000 | 0.026 | 0.000 | 0.003 | 0.037 | 0.003 |
| SHMT2 | 12 | 55913109 | intron7  | 216  |            | deletion of T       |             | 0.005 | 0.000 | 0.000 | NA    | NA    | NA    |
| SHMT2 | 12 | 55913128 | intron7  | 235  |            | G→A                 |             | 0.026 | 0.000 | 0.000 | 0.029 | NA    | NA    |
| SHMT2 | 12 | 55913277 | exon8    | 905  |            | A→C                 | Lys(302)Thr | 0.005 | 0.000 | 0.000 | NA    | NA    | NA    |
| SHMT2 | 12 | 55913341 | exon8    | 969  | rs2229717  | G→T                 | Leu(323)Leu | 0.026 | 0.042 | 0.193 | 0.026 | 0.046 | 0.124 |
| SHMT2 | 12 | 55913423 | intron8  | 28   |            | G→T                 |             | 0.005 | 0.000 | 0.005 | NA    | NA    | NA    |
| SHMT2 | 12 | 55913454 | intron8  | 59   |            | G→A                 |             | 0.005 | 0.000 | 0.000 | NA    | NA    | NA    |
| SHMT2 | 12 | 55913472 | intron8  | 77   |            | C→A                 |             | 0.005 | 0.000 | 0.000 | NA    | NA    | NA    |
| SHMT2 | 12 | 55913792 | intron9  | 80   |            | A→G                 |             | 0.011 | 0.021 | 0.000 | NA    | 0.018 | NA    |
| SHMT2 | 12 | 55913858 | exon10   | 1183 |            | C→T                 | Arg(395)Trp | 0.000 | 0.005 | 0.000 | NA    | NA    | NA    |
| SHMT2 | 12 | 55913984 | intron10 | 30   | rs34095989 | G→A                 |             | 0.203 | 0.432 | 0.224 | 0.138 | 0.431 | 0.387 |
| SHMT2 | 12 | 55914055 | exon11   | 1282 |            | G→A                 | Ala(428)Thr | 0.010 | 0.000 | 0.000 | 0.014 | 0.002 | NA    |
| SHMT2 | 12 | 55914083 | exon11   | 1310 |            | G→A                 | Arg(437)His | 0.000 | 0.000 | 0.031 | NA    | NA    | NA    |
| SHMT2 | 12 | 55914129 | exon11   | 1356 | rs2229718  | C→T                 | Val(452)Val | 0.005 | 0.000 | 0.000 | NA    | NA    | NA    |
| SHMT2 | 12 | 55914504 | 3'UTR    | 1608 |            | C→T                 |             | 0.000 | 0.000 | 0.005 | NA    | NA    | NA    |
| SHMT2 | 12 | 55914680 | 3'UTR    | 1784 |            | deletion of TCTT    |             | 0.000 | 0.026 | 0.000 | NA    | NA    | NA    |
| SHMT2 | 12 | 55914854 | 3'UTR    | 1958 |            | deletion of GCTCCCA |             | 0.016 | 0.000 | 0.000 | NA    | NA    | NA    |
| SHMT2 | 12 | 55914866 | 3'UTR    | 1970 |            | G→A                 |             | 0.005 | 0.000 | 0.000 | NA    | NA    | NA    |
| SHMT2 | 12 | 55915071 | 3'FR     | 2175 |            | G→T                 |             | 0.005 | 0.000 | 0.000 | NA    | NA    | NA    |
| SHMT2 | 12 | 55915080 | 3'FR     | 2184 |            | G→T                 |             | 0.000 | 0.000 | 0.057 | NA    | NA    | 0.031 |
| SHMT2 | 12 | 55915118 | 3'FR     | 2222 |            | G→A                 |             | 0.016 | 0.000 | 0.000 | NA    | NA    | NA    |
| SHMT2 | 12 | 55915184 | 3'FR     | 2288 |            | G→A                 |             | 0.005 | 0.005 | 0.000 | NA    | NA    | NA    |
| SHMT2 | 12 | 55915234 | 3'FR     | 2338 |            | G→A                 |             | 0.000 | 0.005 | 0.000 | NA    | NA    | NA    |

|       |    |          |      |      |            |                         |  |       |       |       |       |       |    |
|-------|----|----------|------|------|------------|-------------------------|--|-------|-------|-------|-------|-------|----|
| SHMT2 | 12 | 55915285 | 3'FR | 2389 |            | C→G                     |  | 0.000 | 0.005 | 0.000 | NA    | NA    | NA |
| SHMT2 | 12 | 55915536 | 3'FR | 2640 |            | G→C                     |  | 0.000 | 0.005 | 0.000 | NA    | NA    | NA |
| SHMT2 | 12 | 55915550 | 3'FR | 2654 |            | insertion of GAGTGGGAAG |  | 0.005 | 0.000 | 0.000 | NA    | NA    | NA |
| SHMT2 | 12 | 55915582 | 3'FR | 2686 |            | G→A                     |  | 0.000 | 0.005 | 0.000 | NA    | NA    | NA |
| SHMT2 | 12 | 55915773 | 3'FR | 2877 |            | G→A                     |  | 0.000 | 0.000 | 0.005 | NA    | NA    | NA |
| SHMT2 | 12 | 55915793 | 3'FR | 2897 | rs58212469 | A→C                     |  | 0.016 | 0.000 | 0.000 | 0.049 | NA    | NA |
| SHMT2 | 12 | 55915875 | 3'FR | 2979 |            | G→A                     |  | 0.010 | 0.047 | 0.005 | NA    | 0.039 | NA |
| SHMT2 | 12 | 55916005 | 3'FR | 3109 |            | A→G                     |  | 0.010 | 0.000 | 0.000 | 0.003 | NA    | NA |
| SHMT2 | 12 | 55916048 | 3'FR | 3152 |            | A→G                     |  | 0.010 | 0.000 | 0.000 | 0.014 | NA    | NA |











# SHMT1

# SHMT2

**Supplementary Figure 1:** LD plots ( $r^2$ ), based on the gene resequencing, generated with Haploview. The variants graphed represent polymorphisms with ethnic specific MAFs  $\geq 1\%$  (EA, HCA, or AA) in *SHMT1* (left) and *SHMT2* (right). The figures at the top represent the genetic structures of *SHMT1* and *SHMT2*, as defined by the UCSC Genome Browser.

EA

HCA

AA

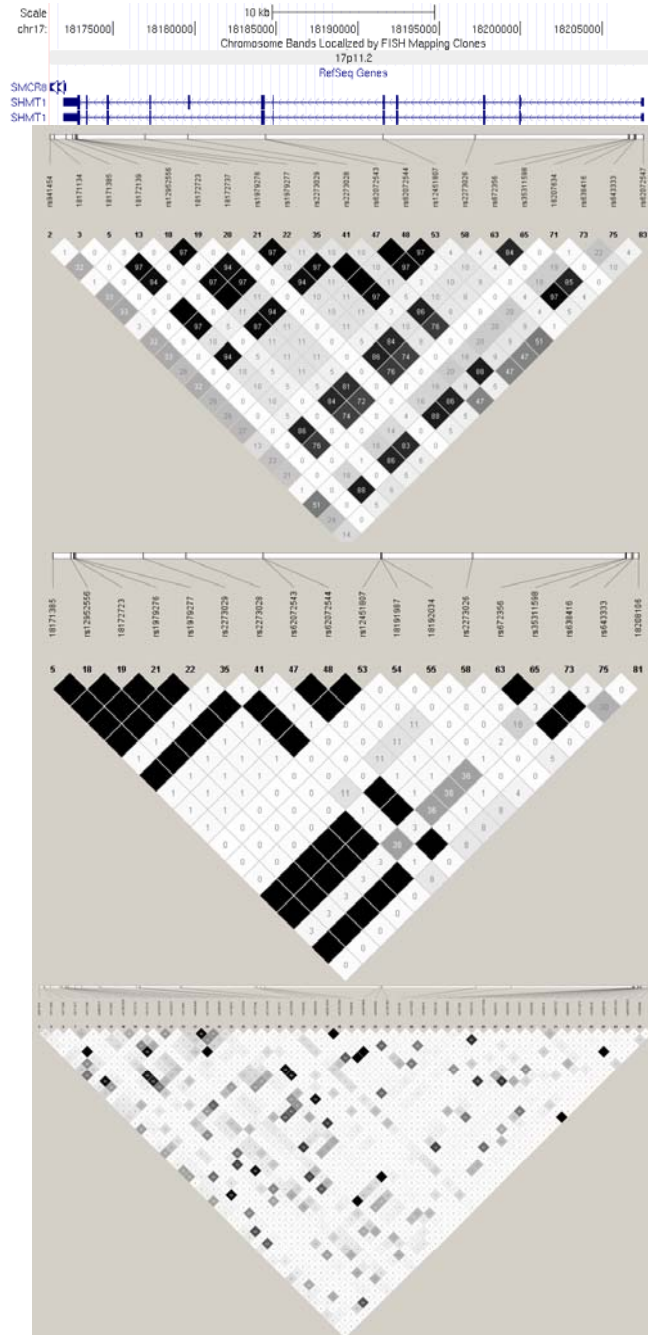

EA

HCA

AA

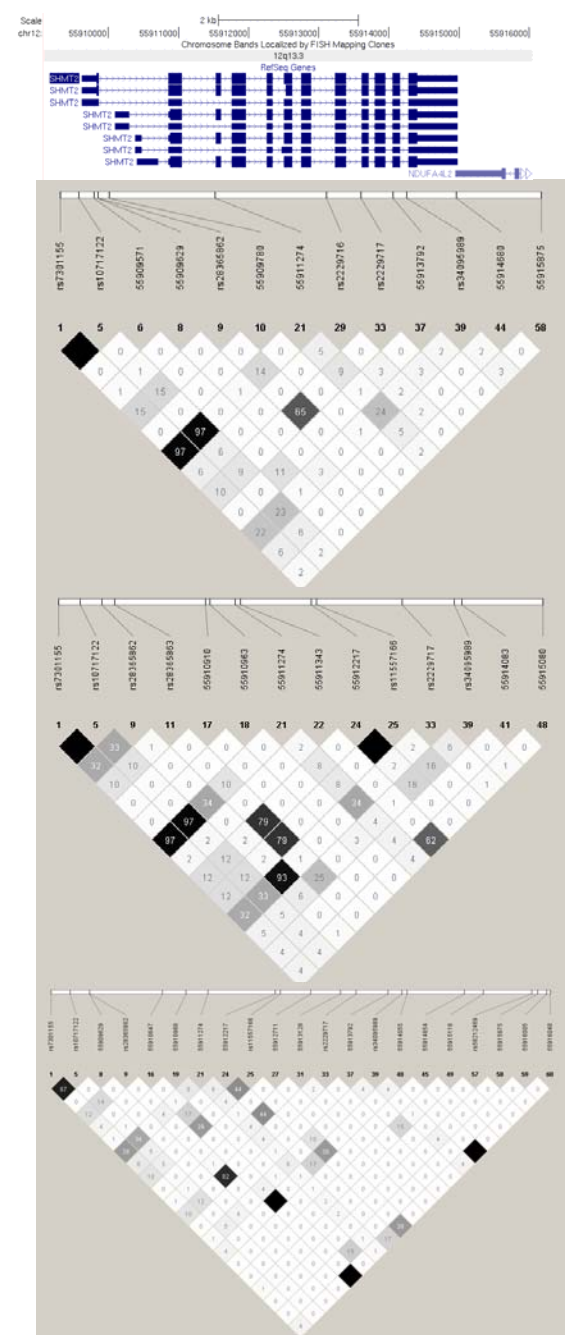

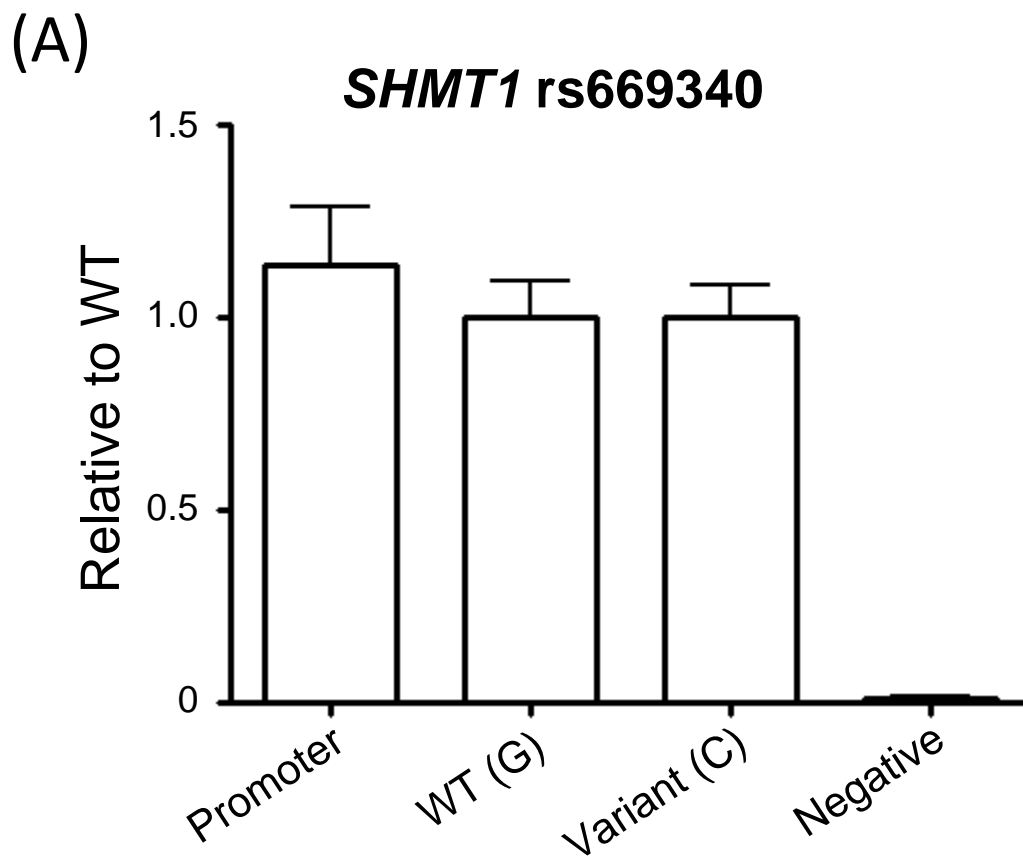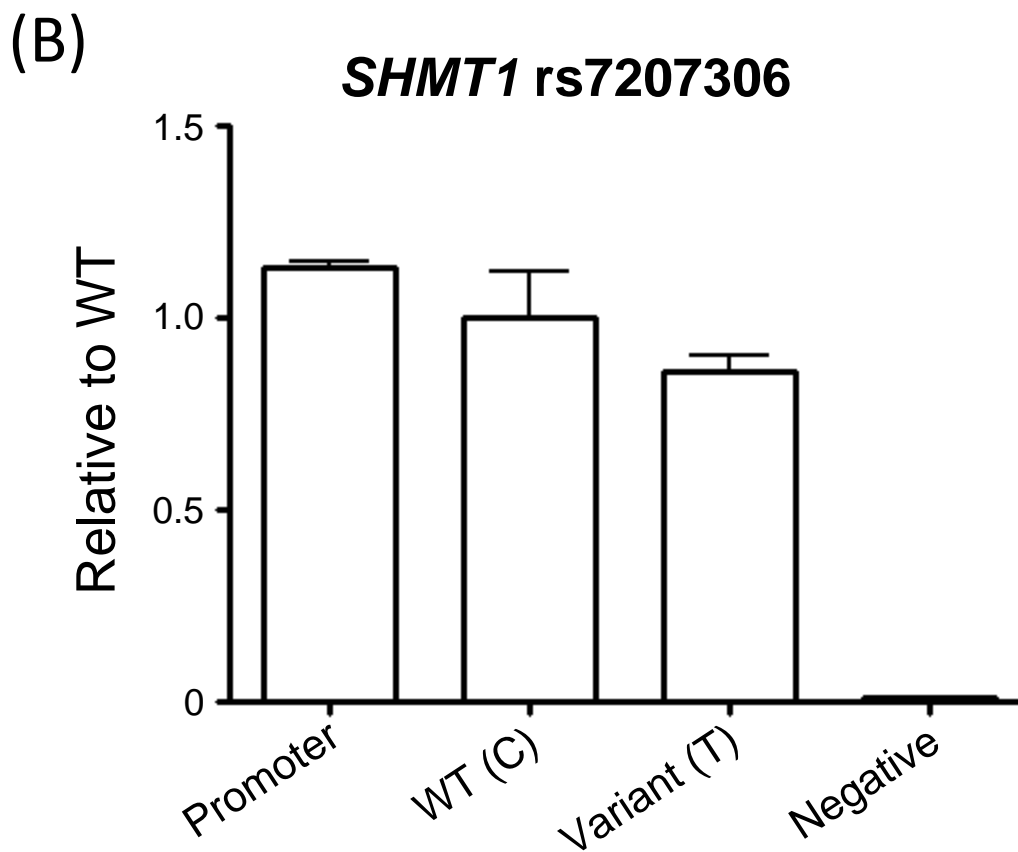

Supplemental Figure 2. Dual reporter assays for (A) rs669340 and (B) rs7207306. Error bars indicate SEM.
